# Supplementary material
Source: PubMed Central journal article supplement (PMC8200363)
Supplement: NIHMS1647916-supplement-1.pdf [file NIHMS1647916-supplement-1.pdf]

**Supplemental Table 1. Association between individual antidepressants (AD) or AD class and depressive symptom severity category**

|                                    | Overall     | Depressive symptom severity category |             |            |            |
|------------------------------------|-------------|--------------------------------------|-------------|------------|------------|
|                                    |             | None                                 | Mild        | Moderate   | Severe     |
| <b>Overall</b>                     |             |                                      |             |            |            |
| No antidepressant                  | 9595 (69.4) | 6686 (69.7)                          | 1579 (16.5) | 947 (9.9)  | 383 (4.0)  |
| Any antidepressant                 | 4226 (30.6) | 2131 (50.4)                          | 908 (21.5)  | 725 (17.2) | 462 (10.9) |
| <b>Antidepressant classes</b>      |             |                                      |             |            |            |
| SSRI                               | 2237 (16.2) | 1180 (52.8)                          | 488 (21.8)  | 358 (16)   | 211 (9.4)  |
| SNRI                               | 1920 (13.9) | 921 (48)                             | 406 (21.1)  | 354 (18.4) | 239 (12.4) |
| Other                              | 69 (0.5)    | 30 (43.5)                            | 14 (20.3)   | 13 (18.8)  | 12 (17.4)  |
| <b>Individuals antidepressants</b> |             |                                      |             |            |            |
| <i>SSRIs</i>                       |             |                                      |             |            |            |
| Paroxetine                         | 178 (1.3)   | 89 (50)                              | 34 (19.1)   | 37 (20.8)  | 18 (10.1)  |
| Fluoxetine                         | 290 (2.1)   | 136 (46.9)                           | 73 (25.2)   | 54 (18.6)  | 27 (9.3)   |
| Sertraline                         | 668 (4.8)   | 369 (55.2)                           | 145 (21.7)  | 102 (15.3) | 52 (7.8)   |
| Citalopram                         | 385 (2.8)   | 227 (59)                             | 71 (18.4)   | 55 (14.3)  | 32 (8.3)   |
| Escitalopram                       | 490 (3.5)   | 254 (51.8)                           | 110 (22.4)  | 73 (14.9)  | 53 (10.8)  |
| <i>SNRI</i>                        |             |                                      |             |            |            |
| Venlafaxine                        | 404 (2.9)   | 194 (48)                             | 89 (22)     | 74 (18.3)  | 47 (11.6)  |
| Duloxetine                         | 783 (5.7)   | 369 (47.1)                           | 163 (20.8)  | 139 (17.8) | 112 (14.3) |
| <i>Other</i>                       |             |                                      |             |            |            |
| Bupropion                          | 582 (4.2)   | 270 (46.4)                           | 135 (23.2)  | 120 (20.6) | 57 (9.8)   |
| Mirtazapine                        | 85 (0.6)    | 34 (40.0)                            | 15 (17.6)   | 20 (23.5)  | 16 (18.8)  |
| Trazodone                          | 292 (2.1)   | 159 (54.5)                           | 59 (20.2)   | 38 (13)    | 36 (12.3)  |

\*Percentages for depressive symptom categories displayed denote the percent of users of a specific anti-depressant who have no, mild, moderate or severe depressive symptoms. For example, of the 178 paroxetine users, 18 (10.1%) report severe depressive symptoms. Overall percentages denote the percentage in all of MS PATHS.
